# Supplementary material for: Sensitive bisphenol determination of environmental water by high-performance liquid chromatography (HPLC) using magnetic sulfo-functionalized metal–organic frameworks nanocomposites as the adsorbent
Source: Royal Society of Chemistry journal article supplement (doi:10.1039/d3nj02851h), 2023-01-01
Supplement: d3nj02851h1.pdf [file d3nj02851h1.pdf]

## Sensitive bisphenol determination of environmental water by high-performance liquid chromatography (HPLC) using magnetic sulfonated metal-organic frameworks nanocomposites as the adsorbent

Feng Zhu,<sup>a</sup> Shi-Xian Xu,<sup>a</sup> Qing Ye,<sup>a</sup> and Xi Chen<sup>\*a</sup>

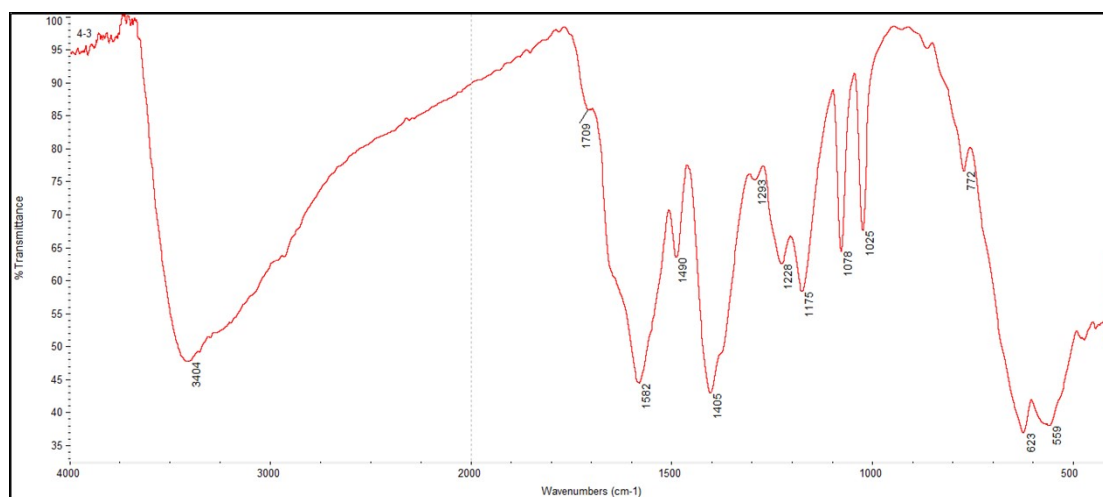

Figure S1. FT-IR spectra of  $\text{Fe}_3\text{O}_4@\text{PDA}@\text{Zr-SO}_3\text{-MOF}$  composites.

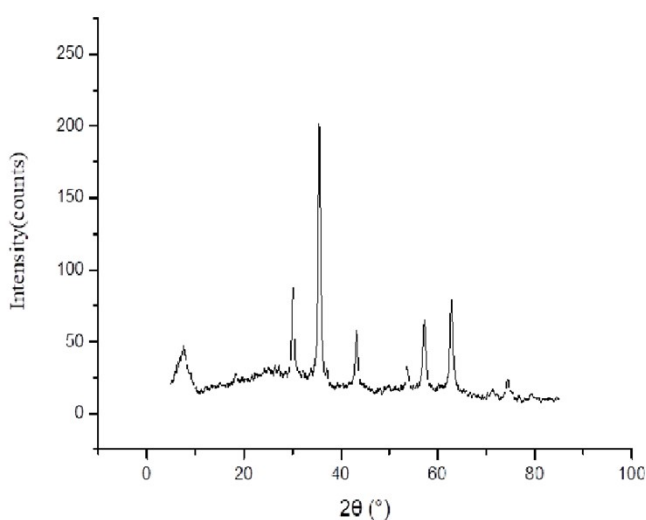

Figure S2. XRD images of  $\text{Fe}_3\text{O}_4@\text{PDA}@\text{Zr-SO}_3\text{-MOF}$  composites.

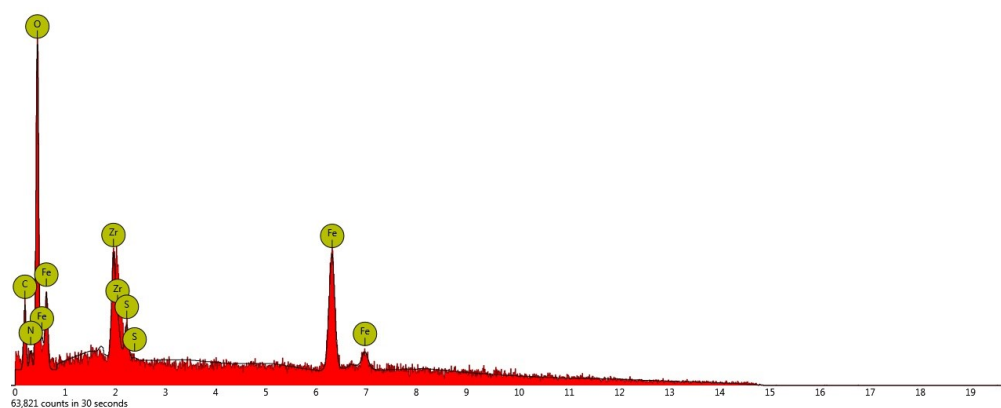

Figure S3. EDX spectra of Fe<sub>3</sub>O<sub>4</sub>@PDA@Zr-SO<sub>3</sub>-MOF composites.

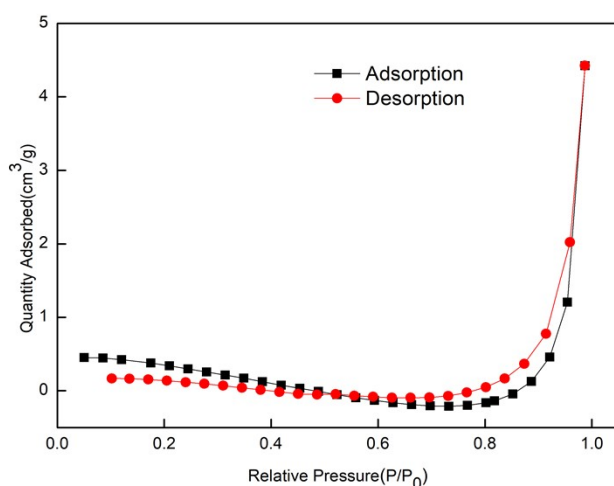

Figure S4. N<sub>2</sub> sorption isotherms of Fe<sub>3</sub>O<sub>4</sub>@PDA@Zr-SO<sub>3</sub>-MOF composites.

Table S1 Comparison of the proposed method with other methods for determination of BPs in various samples

| Extraction method | Sample | Extraction time(min) | Adsorbent                                                          | LODs $\mu\text{g/L}$ | RSDs %    | Recovery % | References |
|-------------------|--------|----------------------|--------------------------------------------------------------------|----------------------|-----------|------------|------------|
| MSPE              | water  | 10                   | magG@PDA@Zr-MOFs                                                   | 0.1-1                | 0.62-4.89 | 64.8-92.8  | [1]        |
| MSPE              | water  | 60                   | PANI@SiO <sub>2</sub> @Fe                                          | 0.009-0.04           | 1.48-3.73 | 92.9-98.9  | [2]        |
| MSPE              | water  | 15                   | 3DG-ZnFe <sub>2</sub> O <sub>4</sub>                               | 0.050-0.15           | 1.7-6.2   | 95.1-103.8 | [3]        |
| MSPE              | water  | 15                   | MNPC                                                               | 0.033-0.071          | 0.3-4.6   | 93.0-101.7 | [4]        |
| MSPE              | water  | 10                   | Fe <sub>3</sub> O <sub>4</sub> -SiO <sub>2</sub> -TiO <sub>2</sub> | 0.5                  | 3.2-7.8   | 92-105     | [5]        |
| MSPE              | milk   | 30                   | Magnetic AC                                                        | 0.75                 | 0.5-3.7   | 89.1-99.4  | [6]        |
| MSPE              | milk   | 30                   | Magnetic nylon 6                                                   | 3.05                 | 9.1-16    | 86-99      | [7]        |
| MSPE              | water  | 10                   | Fe <sub>3</sub> O <sub>4</sub> @PDA@Zr-SO <sub>3</sub> H-MOF       | 0.0048-0.0073        | 3.8-5.1   | 93.1-105.8 | This work  |

magG@PDA@Zr-MOFs: magnetic graphene @polydopamine @Zr-MOF

PANI@SiO<sub>2</sub>@Fe: polyaniline@SiO<sub>2</sub>@Fe

3DG-ZnFe<sub>2</sub>O<sub>4</sub>: three dimensional grapheme--ZnFe<sub>2</sub>O<sub>4</sub>

MNPC: magnetic nanoporous carbon

Magnetic AC: magnetic activated carbon

References:

- 1 X.Y. Wang, C. H. Deng, *Talanta*, 2015, **144**, 1329-1335.
- 2 Q. Zhou, Y. Yuan, Y. Wu and Y. Liu, *J. Sep. Sci.*, 2017, **40**, 4032-4040.
- 3 L. L. Wang, Z. Z. Zhang, J. Zhang and L. Zhang, *J. Chromatogr. A.*, 2016, **1463**, 1-10.
- 4 S. Y. Ma, X. Wang, H. L. Duan, J. Wang, H. Y. Zhan and Z. Q. Zhang, *Talanta*, 2019, **202**, 479-485.
- 5 H. R. Sobhi, M. Ghambarian, M. Behbahani and A. Esrafil, *J. Chromatogr. A.*, 2017, **1518**, 25-33.
- 6 O. Filippou, E. A. Deliyanni and V. F. Samanidou, *J. Chromatogr. A.*, 2017, **1479**, 20-31.
- 7 E. M. Reyes-Gallardo, R. Lucena, S. Cardenas and M. Valcarcel, *Microchem. J.*, 2016, **124**, 751-756.
